# Supplementary material
Source: PubMed Central journal article supplement (PMC3689232)
Supplement: neo1507_0684SD1.pdf [file neo1507_0684SD1.pdf]

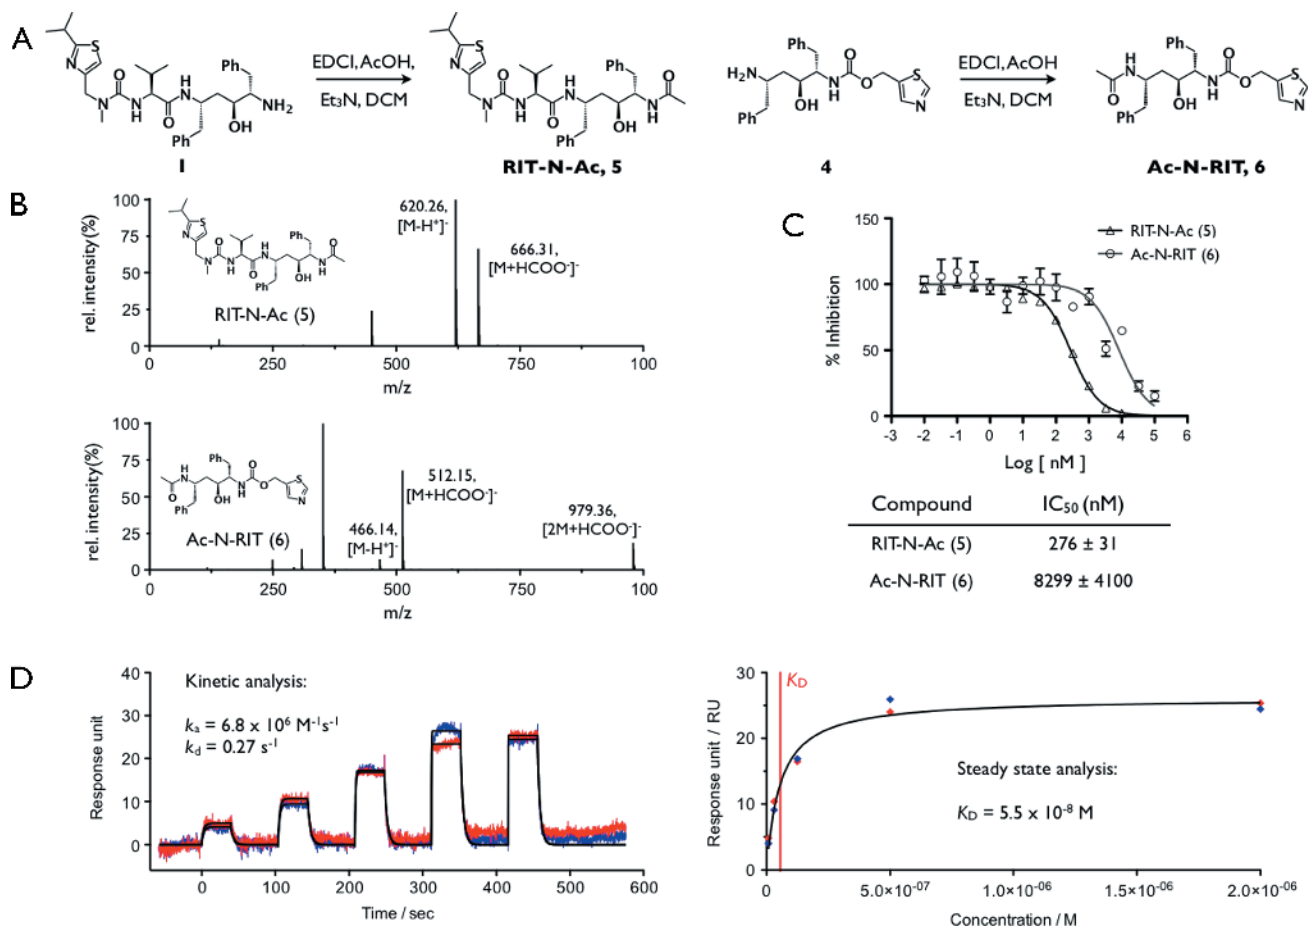

**Figure W1.** Synthesis and characterization of RIT-NH-Ac (**5**) and Ac-NH-RIT (**6**). (A) Synthetic schemes of **5** and **6**. (B) LC-MS analyses of purified of **5** and **6**. (C) Binding affinity data for **5** and **6** against human CTSE. (D) SPR binding data for the interaction of **5** with immobilized CTSE. Red and blue curves depict experimental data (two separate runs); best-fit models overlaid in black.

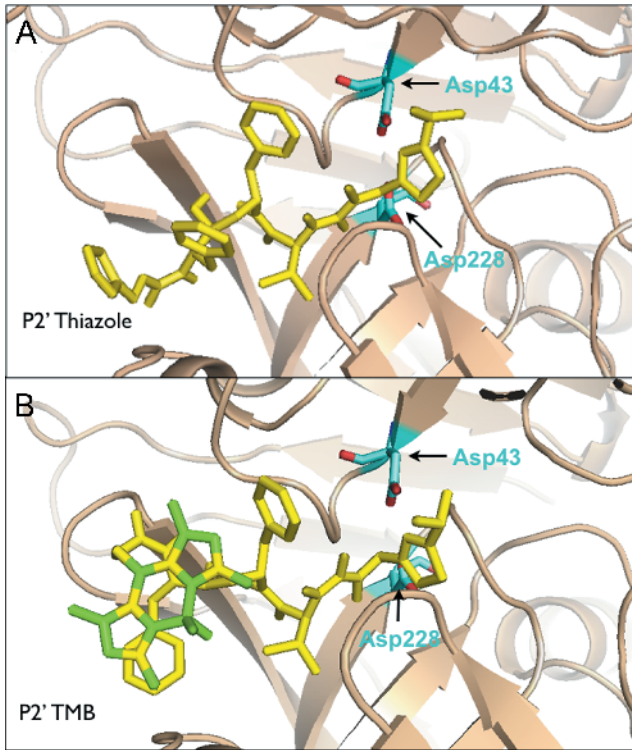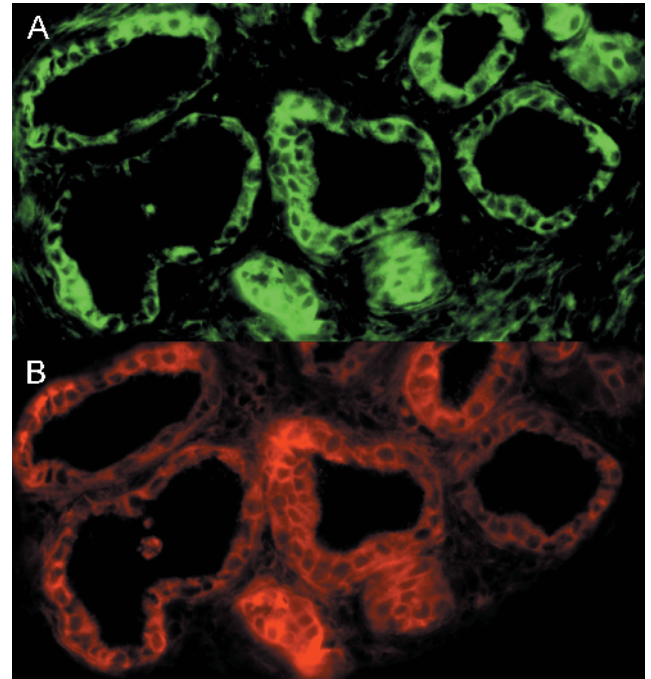

**Figure W2.** Modeling. Simulated docking of RIT (A) and RIT-TMB (B) with homology model of CTSE.

**Figure W3.** Immunofluorescent anti-CTSE/RIT-TMB double staining of tumor section excised from 10-week-old KRAS p53<sup>-/-</sup> model. (A) RIT-TMB (20  $\mu$ M RIT-TMB for 1 hour). (B) Anti-CTSE immunofluorescence.

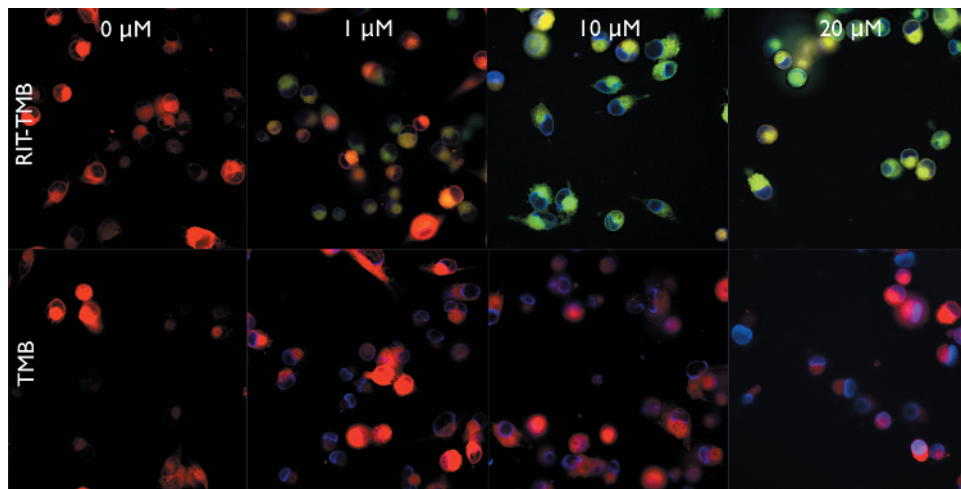

**Figure W4.** PaCa-2 CTSE-mCherry cells incubated with RIT-TMB and TMB (fluorochrome only). CTSE-mCherry (red), RIT-TMB and TMB (green), and 4',6-diamidino-2-phenylindole (blue).

|                     | Species | Comment                                          | Western | mRNA   |
|---------------------|---------|--------------------------------------------------|---------|--------|
| AsPC1               | Human   |                                                  | ND      | 11.9   |
| PANC1               |         |                                                  | 0.3     | 2.9    |
| PACA2               |         |                                                  | 0.5     | 1      |
| PACA2-CathE-mCherry |         | Transduced from PACA2                            | 6.4     | 354396 |
| PANC02              | Mouse   |                                                  | 0.5     | ND     |
| AH367               |         | Kras <sup>+/+</sup><br>+Ink4a/Art <sup>-/-</sup> | 0.5     | ND     |

**Figure W5.** Relative quantification of CTSE protein and mRNA expression in PDAC cell lines.
